# Supplementary material for: Smc5/6’s multifaceted DNA binding capacities stabilize branched DNA structures
Source: PubMed Central journal article supplement (PMC9684126; doi:10.1038/s41467-022-34928-9), 2022-11-23
Supplement: 41467_2022_34928_MOESM3_ESM.pdf [file 41467_2022_34928_MOESM3_ESM.pdf]

## Description of Additional Supplementary Files

File Name: Supplementary Movie 1

Description: Representative continuous 2D scan depicting a  $\lambda$  DNA tether transitioning from LF to HF in the presence of 20 nM Cy3-Smc5/6 (green) and 2 mM ATP.

File Name: Supplementary Movie 2

Description: Representative continuous 2D scan depicting a  $\lambda$  DNA tether transitioning from LF to HF in the presence of 20 nM Alexa555-Smc5/6 ATPase mutant (green), 10 nM LD650-RPA (red), and 2 mM ATP.

File Name: Supplementary Movie 3

Description: Representative continuous 2D scan depicting a  $\lambda$  DNA tether transitioning from LF to HF in the presence of 20 nM Cy3-Smc5/6 (green) and 10 nM LD650-SSB (red).
